# Supplementary material for: Selective recruitment of cortical neurons by electrical stimulation
Source: PubMed Central journal article supplement (PMC6742409; doi:10.1371/journal.pcbi.1007277), 2019-08-26
Supplement: pcbi.1007277.s004.pdf [file pcbi.1007277.s004.pdf]

*S1 Table*

| Cell type                 | Size of dataset | References | Strain (Age)                               |
|---------------------------|-----------------|------------|--------------------------------------------|
| Pyramidal cells (II/III)  | 26              | [5, 18]    | Wistar (P20-25),<br>Sprague Dawley (25-36) |
| Pyramidal cells (IV)      | 33              | [5, 19]    | Wistar (P19-21),<br>Sprague Dawley (25-36) |
| Slender-tufted PYs (Va)   | 43              | [5, 6]     | Wistar (P20-21),<br>Sprague Dawley (25-36) |
| Thick-tufted PYs (Vb)     | 30              | [20]       | Wistar (P14)                               |
| Spiny stellate cells (IV) | 9               | [19]       | Wistar (P19-21)                            |
| Layer I interneurons      | 118             | [16]       | Wistar (P13-16)                            |
| Basket cells (II/III)     | 97              | [8]        | Wistar (P13-15)                            |
| Basket cells (IV)         | 83              | [8]        | Wistar (P13-15)                            |
| Basket cells (V)          | 58              | [8]        | Wistar (P13-15)                            |
| Martinotti cells (II/III) | 13              | [15]       | Wistar (P13-16)                            |
| Martinotti cells (IV)     | 9               | [15]       | Wistar (P13-16)                            |
| Martinotti cells (V)      | 7               | [15]       | Wistar (P13-16)                            |
| Bi-tufted cells (II/III)  | 18              | [8]        | Wistar (P13-15)                            |
| Bi-tufted cells (IV)      | 6               | [8]        | Wistar (P13-15)                            |
| Bi-tufted cells (V)       | 11              | [8]        | Wistar (P13-15)                            |

**S1 Table. Summary of datasets with reconstructed cells.**
