# Supplementary material for: Selective recruitment of cortical neurons by electrical stimulation
Source: PubMed Central journal article supplement (PMC6742409; doi:10.1371/journal.pcbi.1007277), 2019-08-26
Supplement: pcbi.1007277.s005.pdf [file pcbi.1007277.s005.pdf]

S2 Table

| Parameter                            | Description                                                                                   | Value                |            |            |
|--------------------------------------|-----------------------------------------------------------------------------------------------|----------------------|------------|------------|
| $C_m$ ( $\mu F/cm^2$ )               | Membrane capacitance                                                                          | 1                    |            |            |
| $\eta$                               | Standard deviation of spontaneous background activity                                         | 0.4                  |            |            |
| $V_{Na}$ (mV)                        | Na <sup>+</sup> reversal potential                                                            | 50                   |            |            |
| $V_K$ (mV)                           | K <sup>+</sup> reversal potential                                                             | -100                 |            |            |
| $V_{Ca}$ (mV)                        | Ca <sup>2+</sup> reversal potential                                                           | 120                  |            |            |
| $V_{shp}$ (mV)                       |                                                                                               | 2.5                  |            |            |
| $V_{th}$ (mV)                        | Threshold potential                                                                           | 25                   |            |            |
| $k_d$                                |                                                                                               |                      |            |            |
| $\alpha_{Ca}$                        |                                                                                               | 0.005                |            |            |
| $\tau_{Ca}$ ( $ms^{-1}$ )            | Ca <sup>2+</sup> decay time constant                                                          | 200                  |            |            |
| $\alpha_s^{exc}$ ( $ms^{-1}$ )       | Excitatory synaptic activation time constant                                                  | 0.6                  |            |            |
| $\alpha_s^{inh}$ ( $ms^{-1}$ )       | Inhibitory synaptic activation time constant                                                  | 0.5                  |            |            |
| $\beta_s^{exc}$ ( $ms^{-1}$ )        | Excitatory synaptic deactivation time constant                                                | 0.2                  |            |            |
| $\beta_s^{inh}$ ( $ms^{-1}$ )        | Inhibitory synaptic deactivation time constant                                                | 0.1                  |            |            |
| $V_{syn}^{exc}$ (mV)                 | Excitatory synaptic reversal potential                                                        | 0                    |            |            |
| $V_{syn}^{inh}$ (mV)                 | Inhibitory synaptic reversal potential                                                        | -80                  |            |            |
| <b>Cell-Type Specific Parameters</b> |                                                                                               | <b>PYs &amp; SCs</b> | <b>MCs</b> | <b>BCs</b> |
| $g_{Na}$ ( $mS/cm^2$ )               | Na <sup>+</sup> channel conductance                                                           | 30                   | 60         | 60         |
| $g_K$ ( $mS/cm^2$ )                  | K <sup>+</sup> channel conductance                                                            | 2.5                  | 10         | 10         |
| $g_L$ ( $mS/cm^2$ )                  | Leak channel conductance                                                                      | 0.6                  | 0.4        | 0.4        |
| $g_{Ca}$ ( $mS/cm^2$ )               | Ca <sup>2+</sup> channel conductance                                                          | 0.1                  | 0.1        | 0          |
| $g_{ahp}$ ( $mS/cm^2$ )              | Slow Ca <sup>2+</sup> -dependent (after-hyperpolarization) K <sup>+</sup> channel conductance | 0.5                  | 0.75       | 0          |
| $V_L$ (mV)                           | Leak channel reversal potential                                                               | -67                  | -65        | -65        |

**Table 2. Model parameters for network simulations.** PY – pyramidal cell, SC – spiny stellate cell, MC – Martinotti cell, BC – basket cell.
