# Supplementary material for: Selective recruitment of cortical neurons by electrical stimulation
Source: PubMed Central journal article supplement (PMC6742409; doi:10.1371/journal.pcbi.1007277), 2019-08-26
Supplement: pcbi.1007277.s006.pdf [file pcbi.1007277.s006.pdf]

*S3 Table*

| Type of cortical cells | Number of cells |
|------------------------|-----------------|
| PY II/III              | 200             |
| BC II/III              | 50              |
| PY+SC IV               | 200             |
| BC IV                  | 25              |
| MC IV                  | 25              |
| PY Va (slender)        | 50              |
| BC V                   | 25              |
| MC V                   | 25              |

**Table 3. Structure of the network.** PY – pyramidal neurons, BC – basket cells, SC – excitatory spiny stellate cells, MC – Martinotti cells.
