# Supplementary material for: Selective recruitment of cortical neurons by electrical stimulation
Source: PubMed Central journal article supplement (PMC6742409; doi:10.1371/journal.pcbi.1007277), 2019-08-26
Supplement: pcbi.1007277.s007.pdf [file pcbi.1007277.s007.pdf]

S4 Table

| To                   |  | From               | Type | Strength | Probability |
|----------------------|--|--------------------|------|----------|-------------|
| PY, BC II/III        |  | PY II/III          | AMPA | 0.75     | 0.1         |
| PY II/III            |  | PY, SC IV          | AMPA | 1.5      | 0.05        |
| PY II/III            |  | PY Va<br>(slender) | AMPA | 0.75     | 0.05        |
| PY, SC, BC,<br>MC IV |  | PY, SC IV          | AMPA | 1.5      | 0.1         |
| PY, SC IV            |  | PY II/III          | AMPA | 0.25     | 0.05        |
| PY Va<br>(slender)   |  | PY Va<br>(slender) | AMPA | 0.75     | 0.1         |
| BC, MC               |  | PY Va<br>(slender) | AMPA | 0.75     | 0.1         |
| PY II/III            |  | BC II/III          | GABA | 3        | 0.25        |
| PY II/III            |  | MC IV,V            | GABA | 0.5      | 0.05        |
| PY, SC IV            |  | BC IV              | GABA | 3        | 0.25        |
| PY, SC IV            |  | MC IV              | GABA | 3        | 0.25        |
| PY, SC IV            |  | MC V               | GABA | 2        | 0.2         |
| PY Va<br>(slender)   |  | BC V               | GABA | 3        | 0.25        |
| PY Va<br>(slender)   |  | MC IV,V            | GABA | 0.5      | 0.05        |

Table 4. Connectivity within the network. PY – pyramidal neurons, BC – basket cells, SC – excitatory spiny stellate cells, MC – Martinotti cells.
